# Supplementary material
Source: ML conference proceedings conference paper supplement (https://proceedings.neurips.cc/paper_files/paper/2007/hash/08d98638c6fcd194a4b1e6992063e944-Abstract.html)
Supplement: Supplementary file 2 [file 08d98638c6fcd194a4b1e6992063e944-Supplemental.zip]

# Poster M1: Regret Minimization in Games with Incomplete Information

Martin Zinkevich, Michael Johanson,  
Michael Bowling, Carmelo Piccione

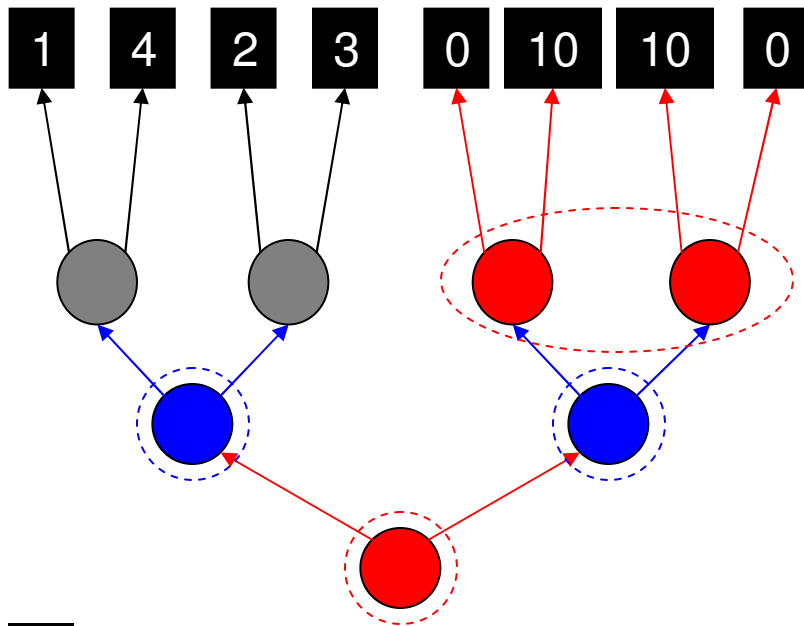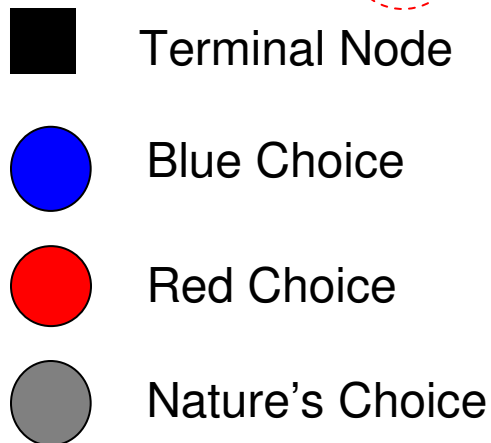

- Learn equilibrium in self-play with mini-agents
- Four orders of magnitude more powerful than CPLEX
- Linear in the number of information sets
- Won AAAI limit equilibrium computer poker competition
- Played competitively against two ruthless poker players.

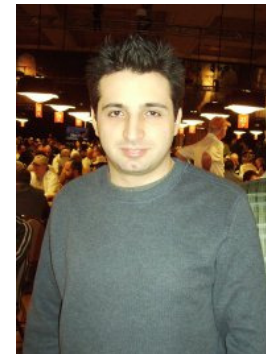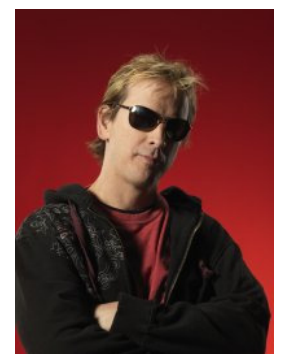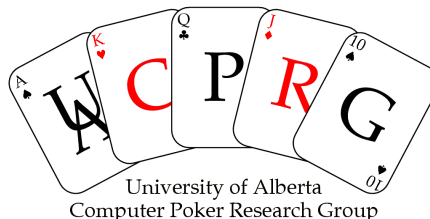

University of Alberta  
Computer Poker Research Group
