# Supplementary material
Source: ML conference proceedings conference paper supplement (https://proceedings.neurips.cc/paper_files/paper/2007/hash/08d98638c6fcd194a4b1e6992063e944-Abstract.html)
Supplement: Supplementary file 3 [file 08d98638c6fcd194a4b1e6992063e944-Supplemental.zip]

Archive with 3 entries (3 files):
- spotlight.pdf
- spotlight.mp3
- paper_regretminimizationincompleteinformation.pdf
